# Supplementary material for: Rare earth metal bis(silylamide) complexes bearing pyridyl-functionalized indenyl ligand: Synthesis, structure and performance in the living polymerization ofl-lactide and rac-lactide
Source: Royal Society of Chemistry journal article supplement (doi:10.1039/c2dt32083e), 2012-11-12
Supplement: c2dt32083e.pdf [file c2dt32083e.pdf]

**Supporting Information for**  
**Rare earth metal bis(silylamide) complexes bearing pyridyl-functionalized**  
**indenyl ligand: synthesis, structure and performance in the living polymerization**  
**of L-lactide and *rac*-lactide**

Yibin Wang, Yinlin Lei, Shuhui Chi and Yunjie Luo \*

*Organometallic Chemistry Laboratory, Ningbo Institute of Technology, Zhejiang*  
*University, Ningbo 315100, P. R. China*

Corresponding author: E-mail: [lyj@nit.zju.edu.cn](mailto:lyj@nit.zju.edu.cn)

Tel: +86-574-88130085

Fax: +86-574-88130130

**Contents**

Fig S1 Molecular Structure of **2**

Fig S2 Molecular Structure of **3**

Fig S3 <sup>1</sup>H NMR of **1**

Fig S4 <sup>13</sup>C NMR of **1**

Fig S5 <sup>1</sup>H NMR of **2**

Fig S6 <sup>1</sup>H NMR of **4**

Fig S7 <sup>13</sup>C NMR of **4**

Fig S8 <sup>1</sup>H-<sup>13</sup>C HMBC spectrum of **4**

Fig S9 <sup>1</sup>H NMR of **5**

Fig S10 <sup>13</sup>C NMR of **5**

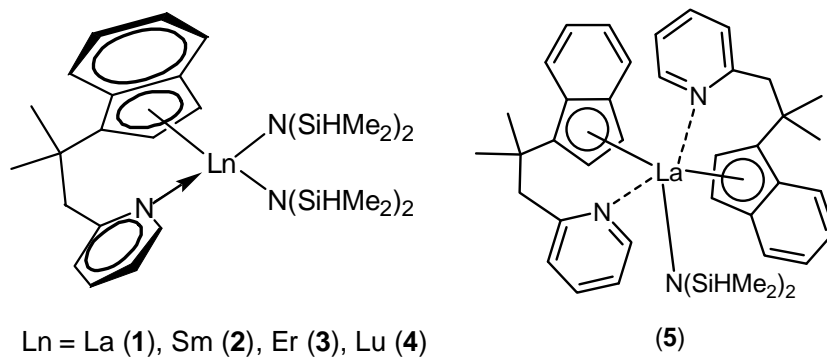



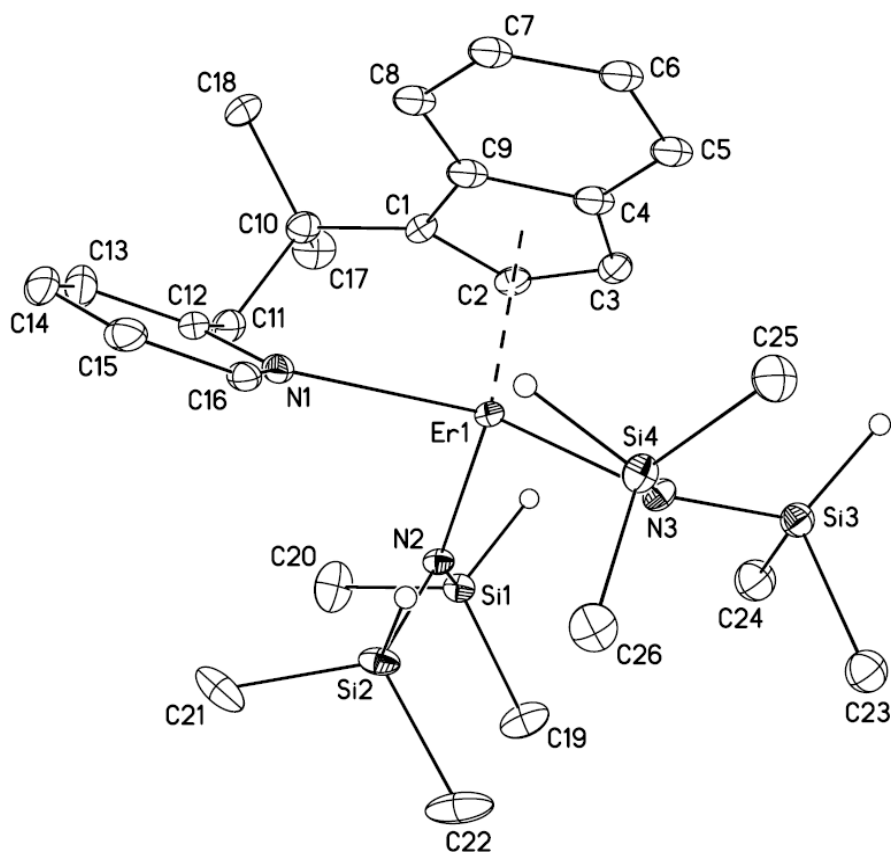

Fig S2. Molecular structure of **3**. Selected bond distances (Å) and bond angles (°) for complex **3**: Er(1)-N(1) 2.513(6), Er(1)-N(2) 2.229(5), Er(1)-N(3) 2.240(5), Er(1)-C(1) 2.674(7), Er(1)-C(2) 2.617(6), Er(1)-C(3) 2.618(7), Er(1)-C(4) 2.664(8), Er(1)-C(9) 2.699(8), C(1)-C(2) 1.404(10), C(2)-C(3) 1.393(10), C(3)-C(4) 1.386(11), C(4)-C(9) 1.455(12), C(1)-C(9) 1.428(9), N(3)-Lu(1)-N(2) 99.2(2), Cp<sub>centroid</sub>-Er(1) 2.368(11); N(3)-Er(1)-N(2) 99.5(2), Cp<sub>centroid</sub>-Er(1)-N1 97.6(3).

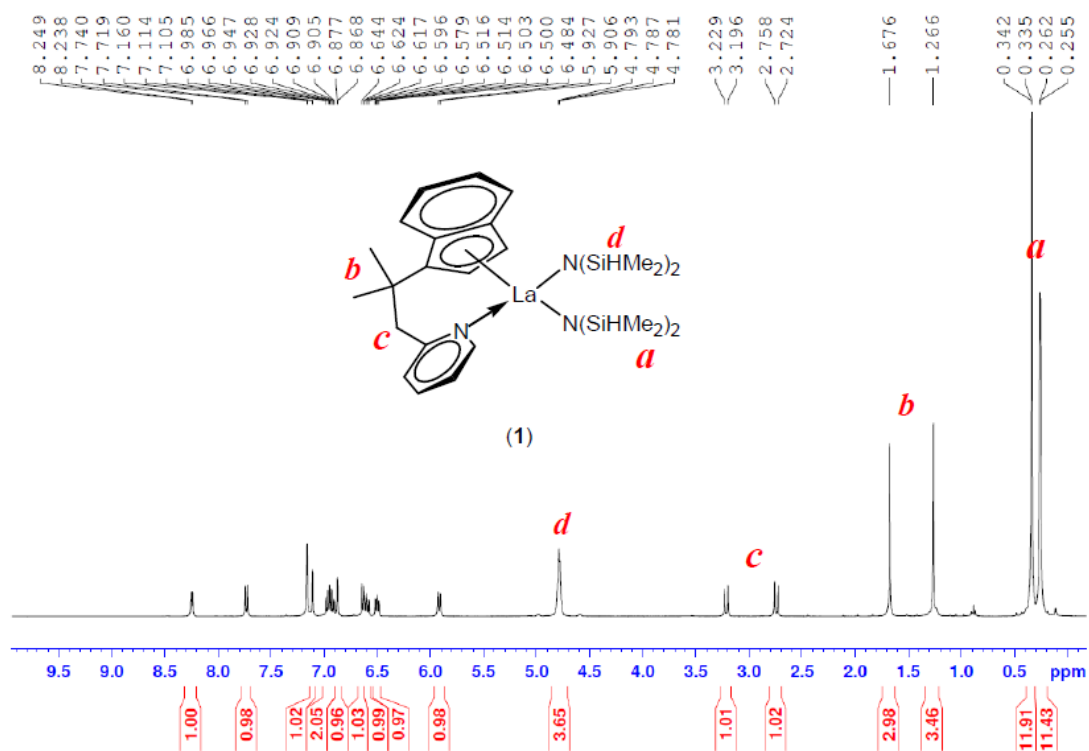

Fig S3. <sup>1</sup>H NMR spectrum of 1

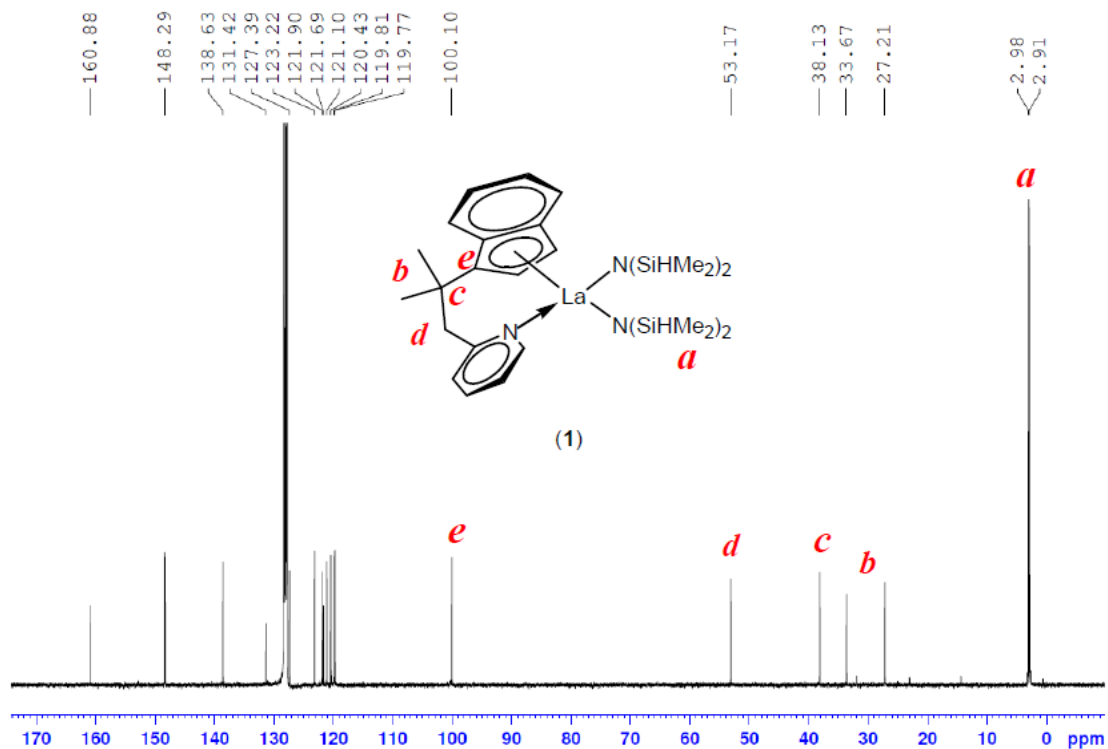

Fig S4. <sup>13</sup>C NMR spectra of 1

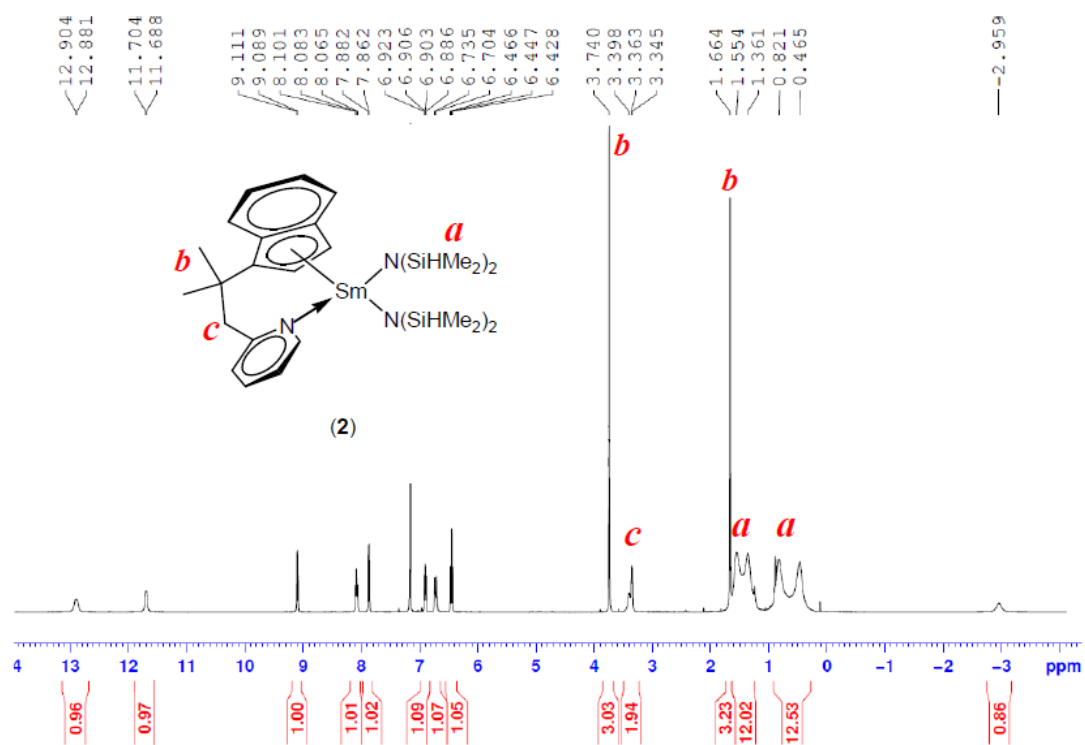

Fig S5.  $^1\text{H}$  NMR spectrum of **2**

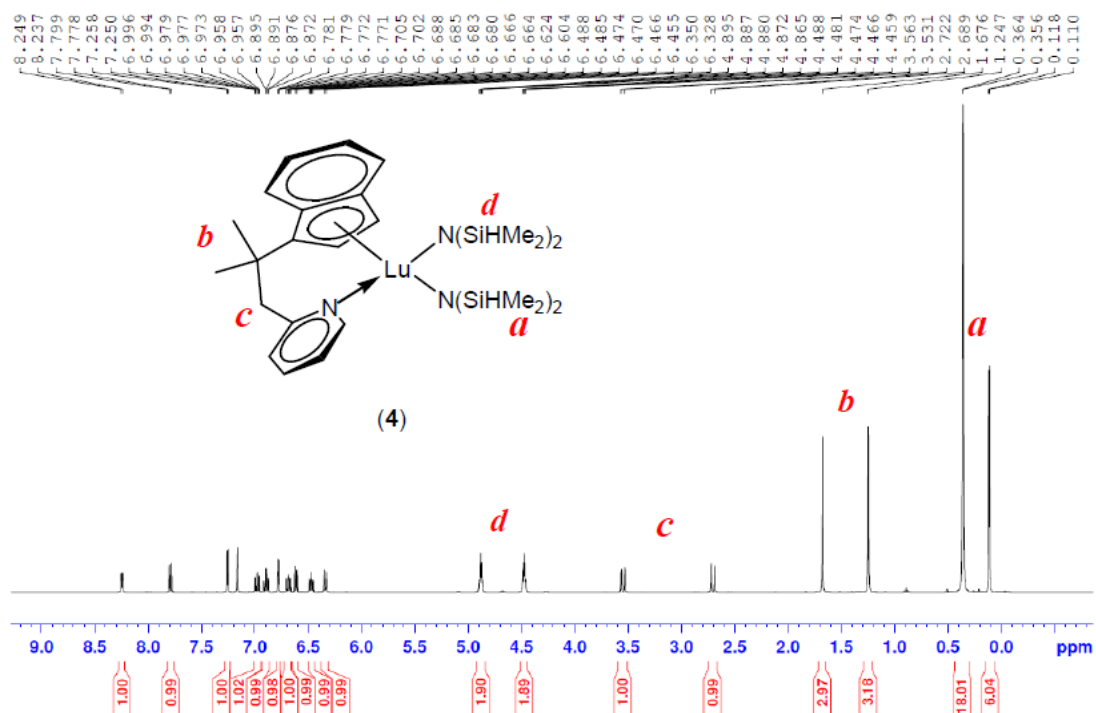

Fig S6. <sup>1</sup>H NMR spectrum of **4**

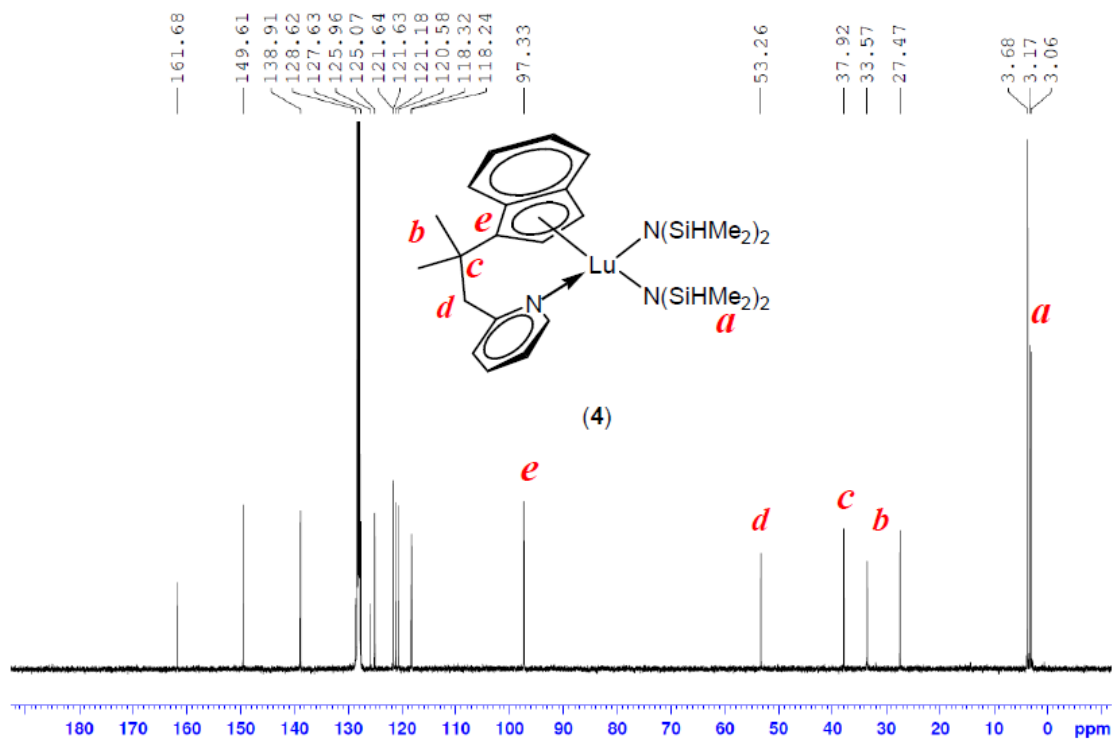

Fig S7. <sup>13</sup>C NMR spectra of **4**

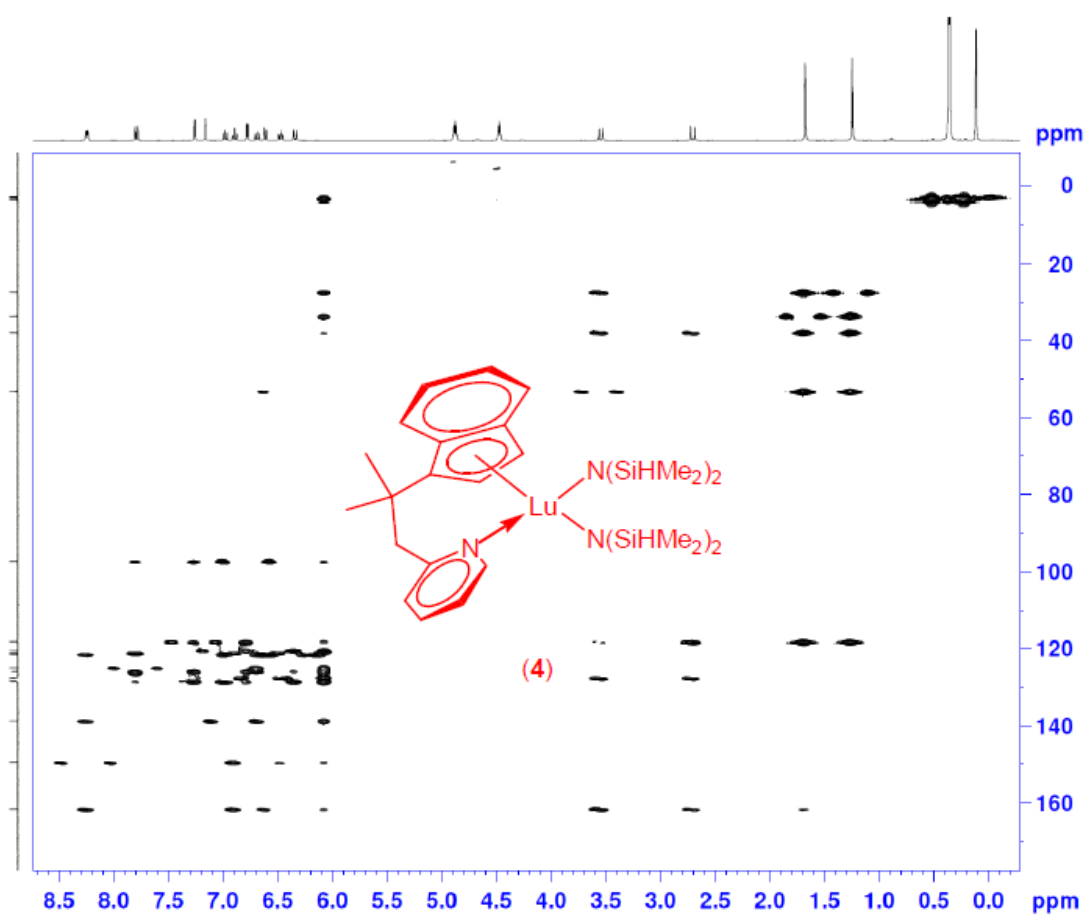

Fig S8.  $^1\text{H}$ - $^{13}\text{C}$  HMBC spectrum of **4**
